# Supplementary material for: Targeting miR-155-5p and miR-221-3p by peptide nucleic acids induces caspase-3 activation and apoptosis in temozolomide-resistant T98G glioma cells
Source: PubMed Central journal article supplement — Int J Oncol. 2019 May 23;55(1):59–68. doi: 10.3892/ijo.2019.4810 (PMC6561624; doi:10.3892/ijo.2019.4810), 2019-05-23
Supplement: Supplementary_Data.pdf [file Supplementary_Data.pdf]

Table SI. List of microRNAs highly expressed in gliomas (top 25% of expressed miRNAs; 406 miRNAs; as published previously in Khalil *et al.* Oncotarget 7 (19): 28195-206. doi: 10.18632/oncotarget.8618).

|                  |                   |                     |                    |                  |
|------------------|-------------------|---------------------|--------------------|------------------|
| hsa-miR-494      | hsa-miR-720_v18.0 | hsa-miR-4281        | hsa-miR-1202       | hsa-miR-1207-5p  |
| hsa-miR-4286     | hsa-miR-1225-5p   | hsa-miR-1274b_v16.0 | hsa-miR-2861       | hsa-miR-1915-3p  |
| hsa-let-7b-5p    | hsa-miR-1268a     | hsa-miR-638         | hsa-miR-3665       | hsa-miR-3679-5p  |
| hsa-miR-4299     | hsa-miR-3162-5p   | hsa-miR-4284        | hsa-let-7c         | hsa-miR-3656     |
| hsa-miR-4270     | hsa-miR-3196      | hsa-miR-940         | hsa-miR-1280_v18.0 | hsa-miR-663a     |
| hsa-let-7a-5p    | hsa-miR-575       | hsa-miR-320c        | hsa-miR-125b-5p    | hsa-miR-4298     |
| hsa-miR-483-5p   | hsa-miR-1246      | hsa-miR-1275        | hsa-miR-3195       | hsa-miR-3141     |
| hsa-miR-9-3p     | hsa-miR-642b-3p   | hsa-miR-320d        | hsa-miR-320b       | hsa-miR-99a-5p   |
| hsa-miR-16-5p    | hsa-miR-24-3p     | hsa-miR-1260a       | hsa-miR-4327       | hsa-miR-762      |
| hsa-miR-320e     | hsa-miR-939-5p    | hsa-miR-150-3p      | hsa-miR-371a-5p    | hsa-miR-188-5p   |
| hsa-miR-2276     | hsa-miR-320a      | hsa-miR-4271        | hsa-let-7f-5p      | hsa-miR-451a     |
| hsa-miR-134      | hsa-miR-106b-5p   | hsa-miR-3911        | hsa-miR-3663-3p    | hsa-miR-574-5p   |
| hsa-miR-630      | hsa-miR-25-3p     | hsa-miR-1274a_v16.0 | hsa-miR-1183       | hsa-miR-1224-5p  |
| hsa-miR-210      | hsa-miR-1972      | hsa-miR-27b-3p      | hsa-miR-671-5p     | hsa-miR-574-3p   |
| hsa-let-7i-5p    | hsa-miR-765       | hsa-miR-1973        | hsa-miR-1290       | hsa-miR-324-3p   |
| hsa-miR-3652     | hsa-miR-103a-3p   | hsa-miR-3198        | hsa-miR-29a-3p     | hsa-miR-1260b    |
| hsa-miR-181a-5p  | hsa-miR-124-3p    | hsa-miR-4306        | hsa-miR-7-5p       | hsa-miR-342-3p   |
| hsa-miR-15b-5p   | hsa-miR-572       | hsa-miR-1914-3p     | hsa-miR-195-5p     | hsa-miR-30d-5p   |
| hsa-miR-21-5p    | hsa-miR-514b-5p   | hsa-let-7g-5p       | hsa-miR-3156-5p    | hsa-miR-3926     |
| hsa-miR-100-5p   | hsa-miR-107       | hsa-miR-3138        | hsa-miR-3934-5p    | hsa-miR-125a-3p  |
| hsa-miR-34a-5p   | hsa-miR-22-3p     | hsa-miR-3917        | hsa-miR-15a-5p     | hsa-miR-3194-5p  |
| hsa-miR-513a-5p  | hsa-miR-19b-3p    | hsa-let-7d-5p       | hsa-miR-497-5p     | hsa-miR-3648     |
| hsa-miR-93-5p    | hsa-miR-92a-3p    | hsa-miR-20a-5p      | hsa-miR-202-3p     | hsa-miR-3137     |
| hsa-miR-23b-3p   | hsa-miR-135a-3p   | hsa-miR-29c-3p      | hsa-miR-1305       | hsa-let-7e-5p    |
| hsa-miR-874      | hsa-miR-4257      | hsa-miR-1471        | hsa-miR-23a-3p     | hsa-miR-130b-3p  |
| hsa-miR-3188     | hsa-miR-3125      | hsa-miR-27a-3p      | hsa-miR-718        | hsa-miR-3937     |
| hsa-miR-1273d    | hsa-miR-9-5p      | hsa-miR-378b        | hsa-miR-3907       | hsa-miR-30a-5p   |
| hsa-miR-361-5p   | hsa-miR-3132      | hsa-miR-197-3p      | hsa-miR-3154       | hsa-miR-424-3p   |
| hsa-miR-1273e    | hsa-miR-3667-5p   | hsa-miR-125b-2-3p   | hsa-miR-601        | hsa-miR-26a-5p   |
| hsa-miR-130a-3p  | hsa-miR-29b-3p    | hsa-miR-181b-5p     | hsa-miR-4314       | hsa-miR-198      |
| hsa-miR-4253     | hsa-miR-664a-5p   | hsa-miR-711         | hsa-miR-4313       | hsa-miR-622      |
| hsa-miR-1226-5p  | hsa-miR-423-5p    | hsa-miR-623         | hsa-miR-331-3p     | hsa-miR-3202     |
| hsa-miR-1181     | hsa-miR-564       | hsa-miR-557         | hsa-miR-149-5p     | hsa-miR-1228-3p  |
| hsa-miR-1249     | hsa-miR-1182      | hsa-miR-17-5p       | hsa-miR-548q       | hsa-miR-4261     |
| hsa-miR-766-3p   | hsa-miR-3682-3p   | hsa-miR-4259        | hsa-miR-193b-3p    | hsa-miR-128      |
| hsa-miR-659-3p   | hsa-miR-3646      | hsa-miR-345-5p      | hsa-miR-3131       | hsa-miR-3945     |
| hsa-miR-30c-5p   | hsa-miR-486-5p    | hsa-miR-212-3p      | hsa-miR-551b-3p    | hsa-miR-3127-5p  |
| hsa-miR-3610     | hsa-miR-3121-3p   | hsa-miR-30b-5p      | hsa-miR-324-5p     | hsa-miR-3622b-5p |
| hsa-miR-129-5p   | hsa-miR-129-2-3p  | hsa-miR-1285-3p     | hsa-miR-3660       | hsa-miR-1299     |
| hsa-miR-3651     | hsa-miR-4322      | hsa-miR-513b        | hsa-miR-99b-5p     | hsa-miR-3935     |
| hsa-miR-30e-5p   | hsa-miR-760       | hsa-miR-1234-3p     | hsa-miR-605        | hsa-miR-151a-5p  |
| hsa-miR-665      | hsa-miR-1288      | hsa-miR-140-3p      | hsa-miR-3147       | hsa-miR-3605-5p  |
| hsa-miR-936      | hsa-miR-132-3p    | hsa-miR-370         | hsa-miR-4294       | hsa-miR-10b-5p   |
| hsa-miR-26b-5p   | hsa-miR-631       | hsa-miR-1208        | hsa-miR-3654       | hsa-miR-20b-5p   |
| hsa-miR-610      | hsa-miR-1273c     | hsa-miR-877-5p      | hsa-miR-1291       | hsa-miR-193b-5p  |
| hsa-miR-125a-5p  | hsa-miR-33b-3p    | hsa-miR-498         | hsa-miR-3621       | hsa-miR-887      |
| hsa-miR-3173-3p  | hsa-miR-662       | hsa-miR-23a-5p      | hsa-miR-4304       | hsa-miR-513c-5p  |
| hsa-miR-3161     | hsa-miR-187-5p    | hsa-miR-3190-3p     | hsa-miR-92b-3p     | hsa-miR-500a-5p  |
| hsa-miR-4291     | hsa-miR-365b-5p   | hsa-miR-3174        | hsa-miR-378_v17.0  | hsa-miR-155-5p   |
| hsa-miR-425-5p   | hsa-miR-181d      | hsa-miR-3620-3p     | hsa-miR-330-3p     | hsa-miR-1469     |
| hsa-miR-149-3p   | hsa-miR-566       | hsa-miR-1225-3p     | hsa-miR-3680-3p    | hsa-miR-1281     |
| hsa-miR-181c-5p  | hsa-miR-19a-3p    | hsa-miR-4269        | hsa-miR-584-5p     | hsa-miR-769-5p   |
| hsa-miR-550a-5p  | hsa-miR-139-3p    | hsa-miR-526b-5p     | hsa-miR-1238-3p    | hsa-miR-4323     |
| hsa-miR-3180-3p  | hsa-miR-602       | hsa-miR-648         | hsa-miR-3614-5p    | hsa-miR-126-3p   |
| hsa-miR-185-5p   | hsa-miR-424-5p    | hsa-miR-892b        | hsa-miR-196a-5p    | hsa-miR-191-3p   |
| hsa-miR-30c-2-3p | hsa-miR-501-5p    | hsa-miR-3659        | hsa-miR-770-5p     | hsa-miR-3692-5p  |
| hsa-miR-650      | hsa-miR-99b-3p    | hsa-miR-4251        | hsa-miR-3713       | hsa-miR-204-5p   |

|                  |                   |                  |                 |                 |
|------------------|-------------------|------------------|-----------------|-----------------|
| hsa-miR-1306-3p  | hsa-miR-877-3p    | hsa-miR-520b     | hsa-miR-1825    | hsa-miR-422a    |
| hsa-miR-30c-1-3p | hsa-miR-3676-3p   | hsa-miR-425-3p   | hsa-miR-4324    | hsa-miR-2277-3p |
| hsa-miR-490-5p   | hsa-miR-373-5p    | hsa-miR-1229-3p  | hsa-miR-629-3p  | hsa-miR-3663-5p |
| hsa-miR-708-5p   | hsa-miR-127-3p    | hsa-miR-3187-3p  | hsa-miR-151a-3p | hsa-miR-378c    |
| hsa-miR-296-5p   | hsa-miR-3177-3p   | hsa-miR-519e-5p  | hsa-miR-1539    | hsa-miR-501-3p  |
| hsa-miR-636      | hsa-miR-339-3p    | hsa-miR-181c-3p  | hsa-miR-3185    | hsa-miR-654-5p  |
| hsa-miR-769-3p   | hsa-miR-200a-5p   | hsa-miR-4260     | hsa-miR-193a-5p | hsa-miR-3189-3p |
| hsa-miR-1321     | hsa-miR-338-3p    | hsa-miR-3163     | hsa-miR-1909-5p | hsa-miR-140-5p  |
| hsa-miR-520e     | hsa-miR-3622a-5p  | hsa-miR-195-3p   | hsa-miR-432-5p  | hsa-miR-516a-5p |
| hsa-miR-663b     | hsa-miR-328       | hsa-miR-29c-5p   | hsa-miR-3124-5p | hsa-miR-298     |
| hsa-miR-223-3p   | hsa-miR-219-5p    | hsa-miR-933      | hsa-miR-145-5p  | hsa-miR-518c-5p |
| hsa-miR-423-3p   | hsa-miR-3186-3p   | hsa-miR-30b-3p   | hsa-miR-138-5p  | hsa-miR-381-3p  |
| hsa-miR-1307-3p  | hsa-miR-222-3p    | hsa-miR-138-2-3p | hsa-miR-1303    | hsa-miR-516b-5p |
| hsa-miR-1237-3p  | hsa-miR-484       | hsa-miR-365a-3p  | hsa-miR-4267    | hsa-miR-184     |
| hsa-miR-1295a    | hsa-miR-221-3p    | hsa-miR-639      | hsa-miR-921     | hsa-miR-493-3p  |
| hsa-miR-150-5p   | hsa-miR-194-3p    | hsa-miR-200b-5p  | hsa-miR-583     | hsa-miR-616-3p  |
| hsa-miR-3200-5p  | hsa-miR-338-5p    | hsa-miR-10b-3p   | hsa-miR-1180    | hsa-miR-1228-5p |
| hsa-miR-1254     | hsa-miR-125b-1-3p | hsa-miR-1276     | hsa-miR-1287    | hsa-miR-1323    |
| hsa-miR-183-3p   | hsa-miR-1915-5p   | hsa-miR-296-3p   | hsa-miR-302c-5p | hsa-miR-3180-5p |
| hsa-miR-3181     | hsa-miR-3197      | hsa-miR-3617-5p  | hsa-miR-3653    | hsa-miR-3666    |
| hsa-miR-3679-3p  | hsa-miR-3915      | hsa-miR-3923     | hsa-miR-3925-5p | hsa-miR-3938    |
| hsa-miR-409-3p   | hsa-miR-4274      | hsa-miR-4300     | hsa-miR-4311    | hsa-miR-490-3p  |
| hsa-miR-492      | hsa-miR-508-5     | hsa-miR-518a-5p  | hsa-miR-518e-5p | hsa-miR-525-5p  |
| hsa-miR-551b-5p  | hsa-miR-617       | hsa-miR-627      | hsa-miR-658     | hsa-miR-671-3p  |
| hsa-miR-934      |                   |                  |                 |                 |

---

Table SII. List of published oncomiRNAs in gliomas.

---

|             |            |
|-------------|------------|
| miR-10a     | miR-25     |
| miR-10b-3p  | miR-26a    |
| miR-125b    | miR-27b    |
| miR-130b-3p | miR-29a    |
| miR-143     | miR-30a-5p |
| miR-145     | miR-31     |
| miR-148a-3p | miR-323a   |
| miR-155-5p  | miR-323b   |
| miR-15a-5p  | miR-328    |
| miR-16-1    | miR-335    |
| miR-16-2    | miR-363    |
| miR-17-5p   | miR-381    |
| miR-182     | miR-455-3p |
| miR-18a     | miR-582-5p |
| miR-193a    | miR-603    |
| miR-195-5p  | miR-873    |
| miR-196b    | miR-9      |
| miR-19a     | miR-92a    |
| miR-19b     | miR-92b    |
| miR-200a    | miR-93     |
| miR-200b    | miR-21-3p  |
| miR-20a-5p  | miR-210    |
| miR-20b     | miR-221-3p |

---

Table SIII. List of microRNAs potentially targeting the 3'UTR sequence of CASP-3 mRNA.

---

|             |             |
|-------------|-------------|
| let-7a-5p   | miR-382-5p  |
| let-7g-5p   | miR-421     |
| miR-128-3p  | miR-4666b   |
| miR-138-5p  | miR-5011-3p |
| miR-155-5p  | miR-548     |
| miR-196a-5p | miR-562     |
| miR-221-3p  | miR-582-5p  |
| miR-26b-5p  | miR-6076    |
| miR-30a-5p  | miR-6124    |
| miR-30b-5p  | miR-651-3p  |
| miR-30d-5p  | miR-6797-3p |
| miR-363-3p  | miR-885-5p  |
| miR-3680-3p | miR-888-5p  |
| miR-374a-5p | miR-30e-5p  |
| miR-375     |             |

---
